# Supplementary material for: Lymph node fibroblastic reticular cells preserve a tolerogenic niche in allograft transplantation through laminin α4
Source: PubMed Central journal article supplement (PMC9246384; doi:10.1172/jci156994), 2022-07-01
Supplement: jci-132-156994-s010.pdf [file jci-132-156994-s010.pdf]

## Supplementary figures

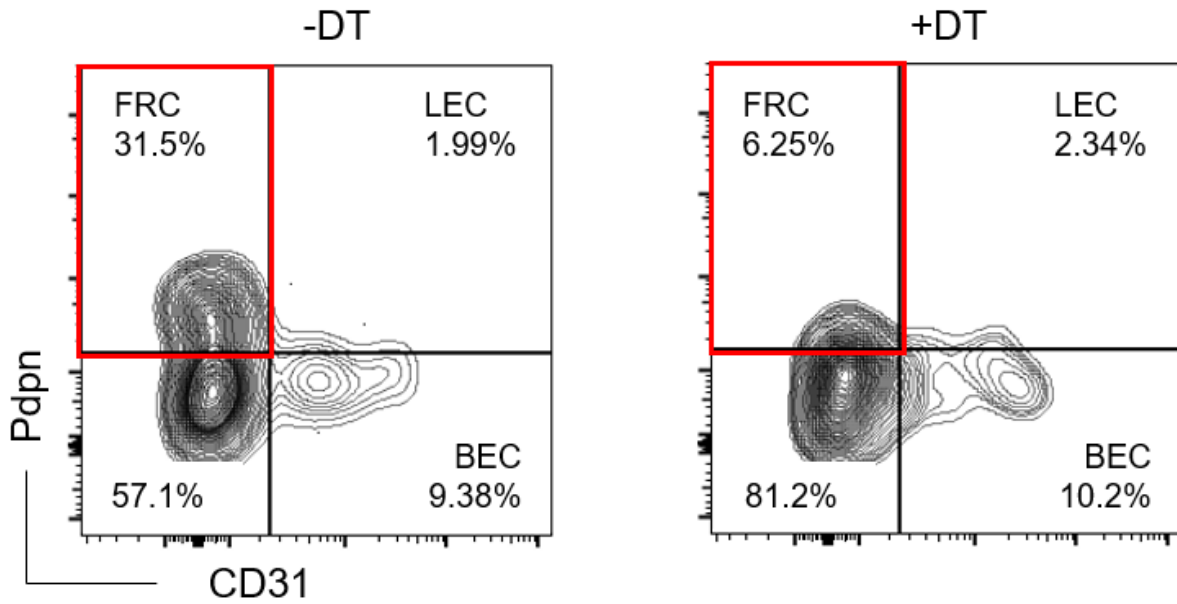

**Figure S1. Diphtheria toxin inducible depletion of FRCs in CCL19/iDTR mice.** CCL19/iDTR mice received diphtheria toxin (DT) (i.p. 100 ng/day), using PBS for negative control. After 5 days, LNs harvested, and single cell suspension stained for flow cytometry. Pdpn<sup>+</sup>CD31<sup>-</sup> FRCs, Pdpn<sup>+</sup>CD31<sup>+</sup> LECs, Pdpn<sup>-</sup>CD31<sup>+</sup> BECs gated from CD45<sup>-</sup> cells.

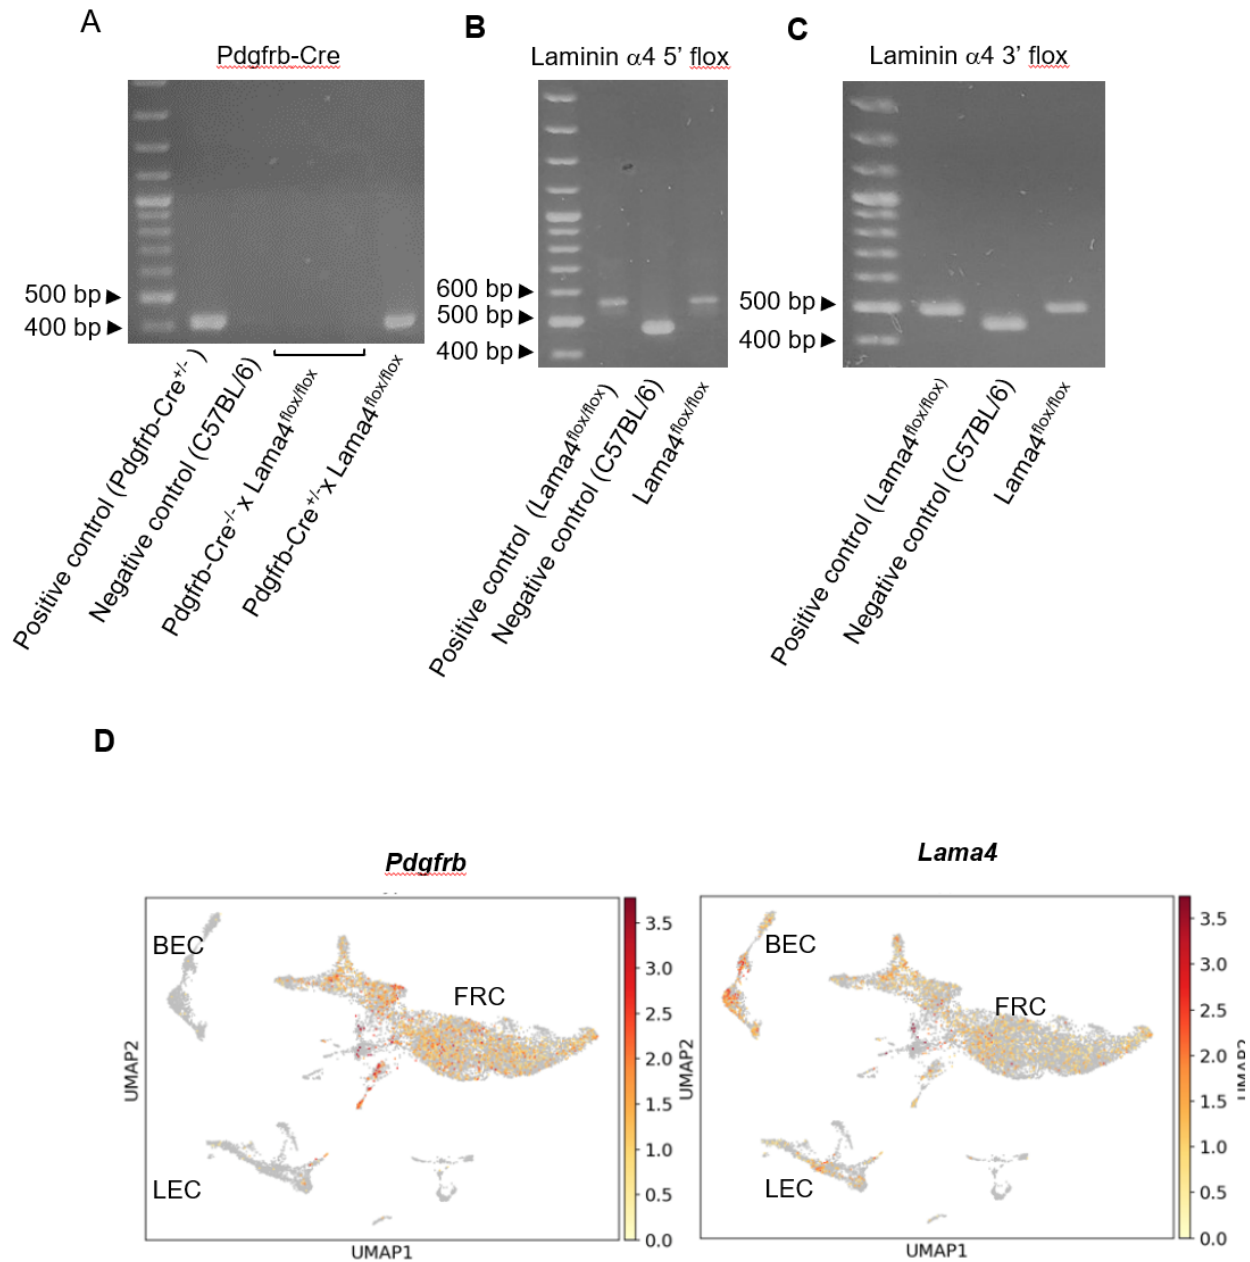

**Figure S2. Genotype of Pdgfrb-Cre<sup>+/-</sup> x Lama4<sup>flox/flox</sup> mice.** Cre inserted in the promoter of Pdgfrb and flox inserted 5' and 3' of Lama4 exon 3; insertions assessed by PCR of gDNA. **A.** Pdgfrb-cre band ~410 bp. Pdgfrb-Cre<sup>+/-</sup> positive control; C57BL/6 negative control. **B.** 5' flox ~570 bp, WT ~470 bp. Lama4<sup>flox/flox</sup> positive control; C57BL/6 negative control. **C.** 3' flox ~490 bp, WT ~440 bp. Lama4<sup>flox/flox</sup> positive control; C57BL/6 negative control. **D.** scRNA-seq analysis showed Lama4 widely expressed in LNSCs, but Pdgfrb exclusively expressed in FRCs.

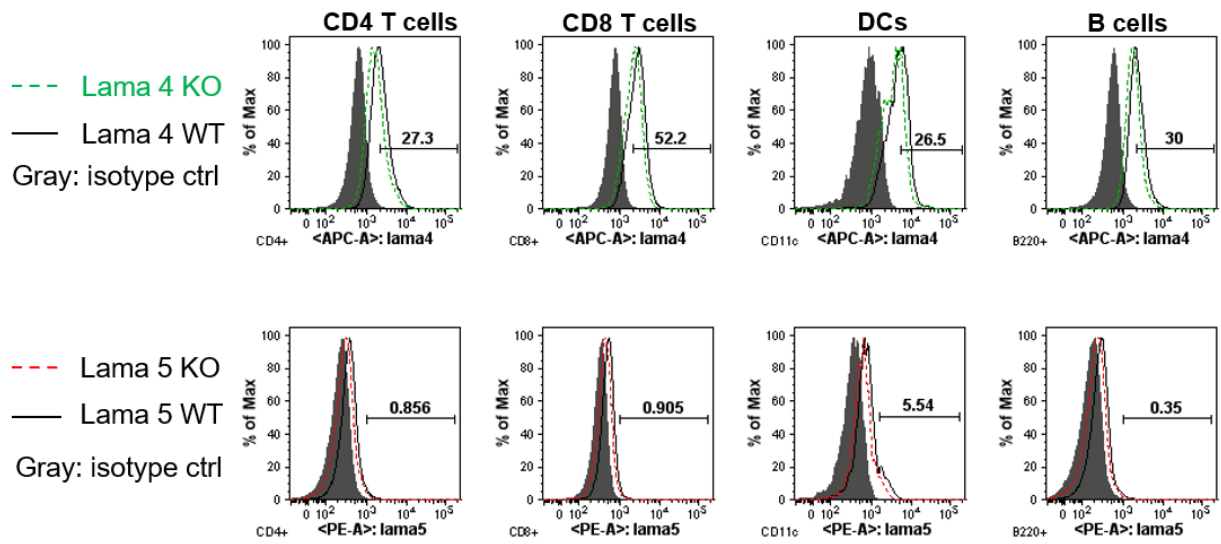

**Figure S3. Lama4 and Lama5 expression in CD4, CD8 T cells, B cells, DC cells:** pLN single cell suspension stained for Lama4 and Lama5, and CD4, CD8, CD11c (DCs) and B220 (B cells). In the graph, values show Lama 4 or Lama 5 percentage.

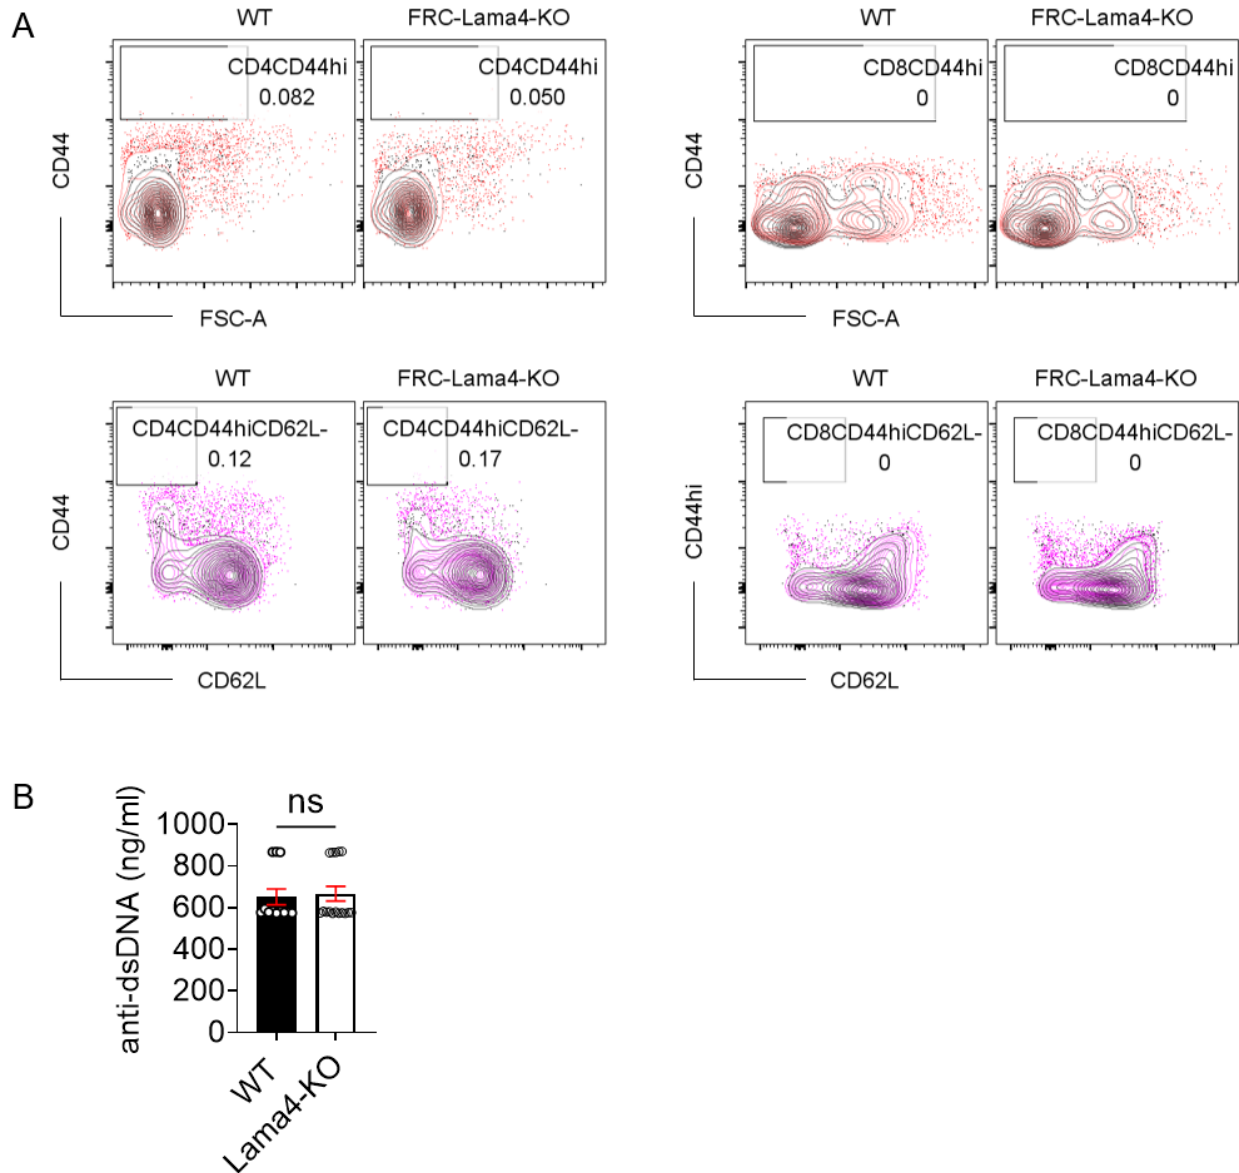

**Figure S4. Depleting FRC-Lama4 does not cause systemic cell activation or autoimmunity in naïve or aged mice. A:** Assessment of activated T cells in LNs of naïve WT and FRC-Lama4-KO mice. Single cell suspensions stained for CD4, CD8, CD44 and CD62L and analyzed using flow cytometry. CD44hi or CD44hiCD62L- populations out of CD4 and CD8 T cells gated as activated cells. Values indicate percentages. **B:** Anti-dsDNA measured in sera of aged WT and FRC-Lama4-KO mice which were over one-year old. Student's unpaired 2-tailed t tests for two groups comparison. Mean  $\pm$  SEM,  $n=8$ ,  $p < 0.05$  is recognized as significant difference.

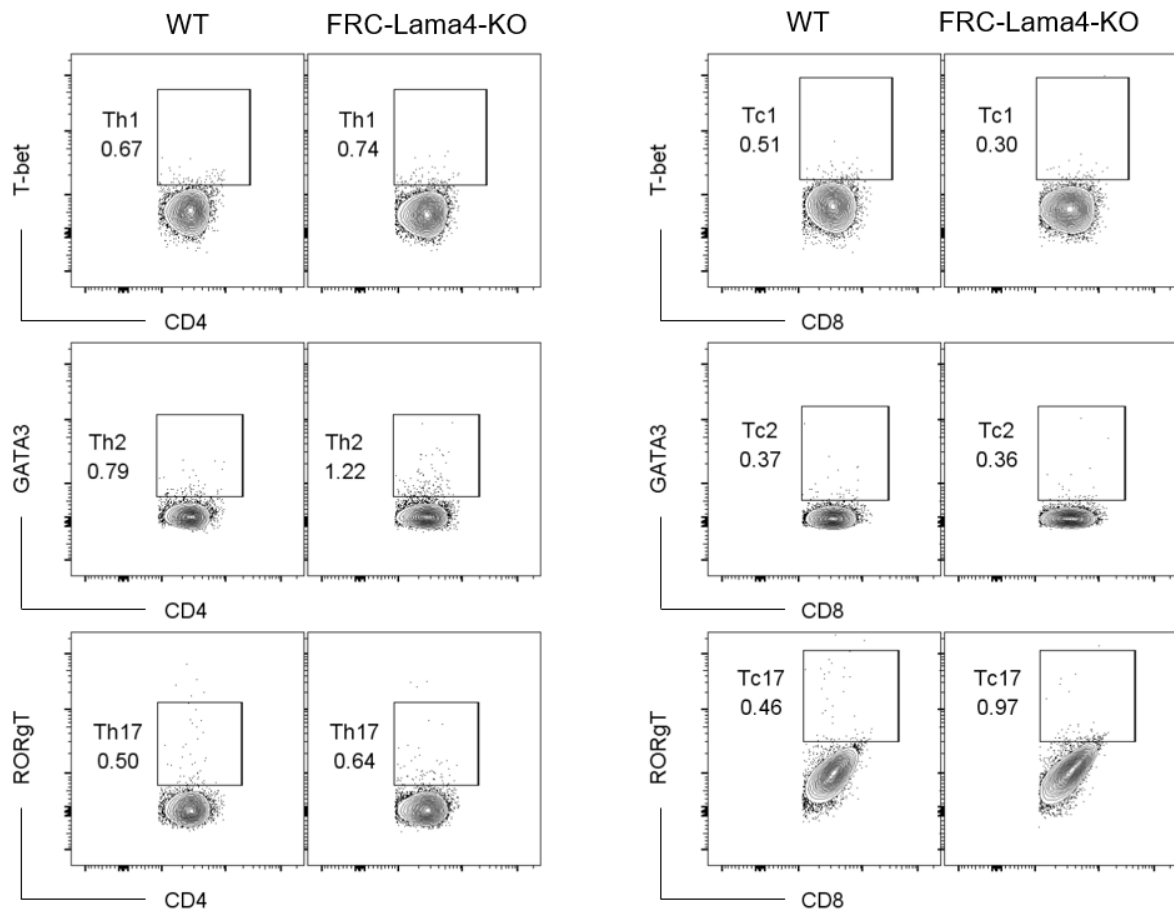

**Figure S5. T effector cells in naïve LNs of WT and FRC-Lama4-KO mice.** LNs isolated and single cell suspensions stained for CD4, CD8, T-bet, GATA3, ROR $\gamma$ T and analyzed using flow cytometry. Values indicate percentage.

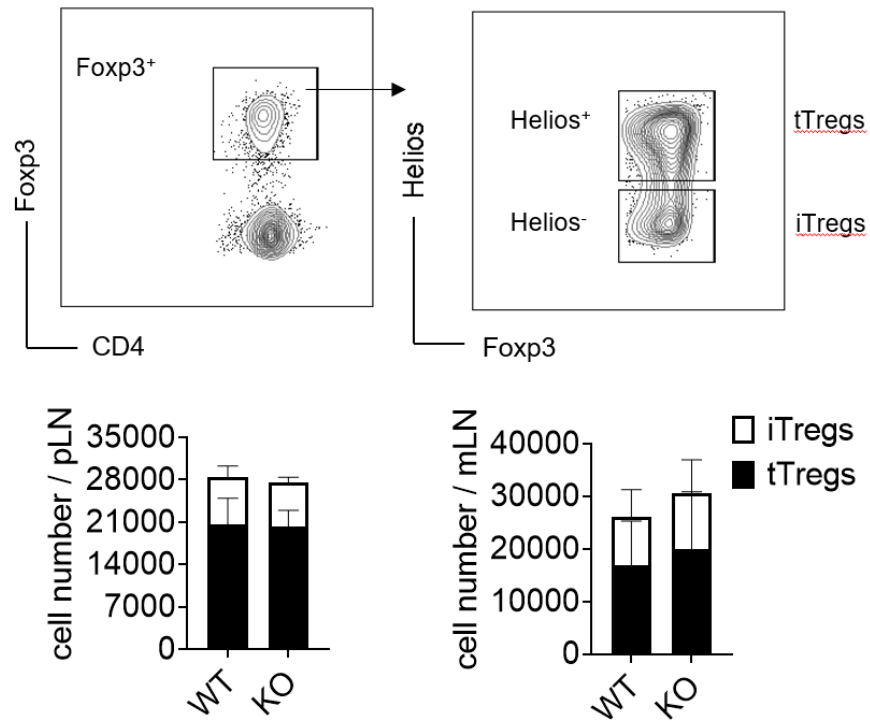

**Figure S6. Thymic Tregs (tTregs, Fxp3<sup>+</sup>Helios<sup>+</sup>) and induced Tregs (iTregs, Fxp3<sup>+</sup>Helios<sup>-</sup>) abundance in WT and Lama 4 KO LNs.** Gating and quantification of total Tregs (Fxp3<sup>+</sup>), thymic Tregs (tTregs, Fxp3<sup>+</sup>Helios<sup>+</sup>), and induced Tregs (iTregs, Fxp3<sup>+</sup>Helios<sup>-</sup>) in Lama4 KO and WT LNs.

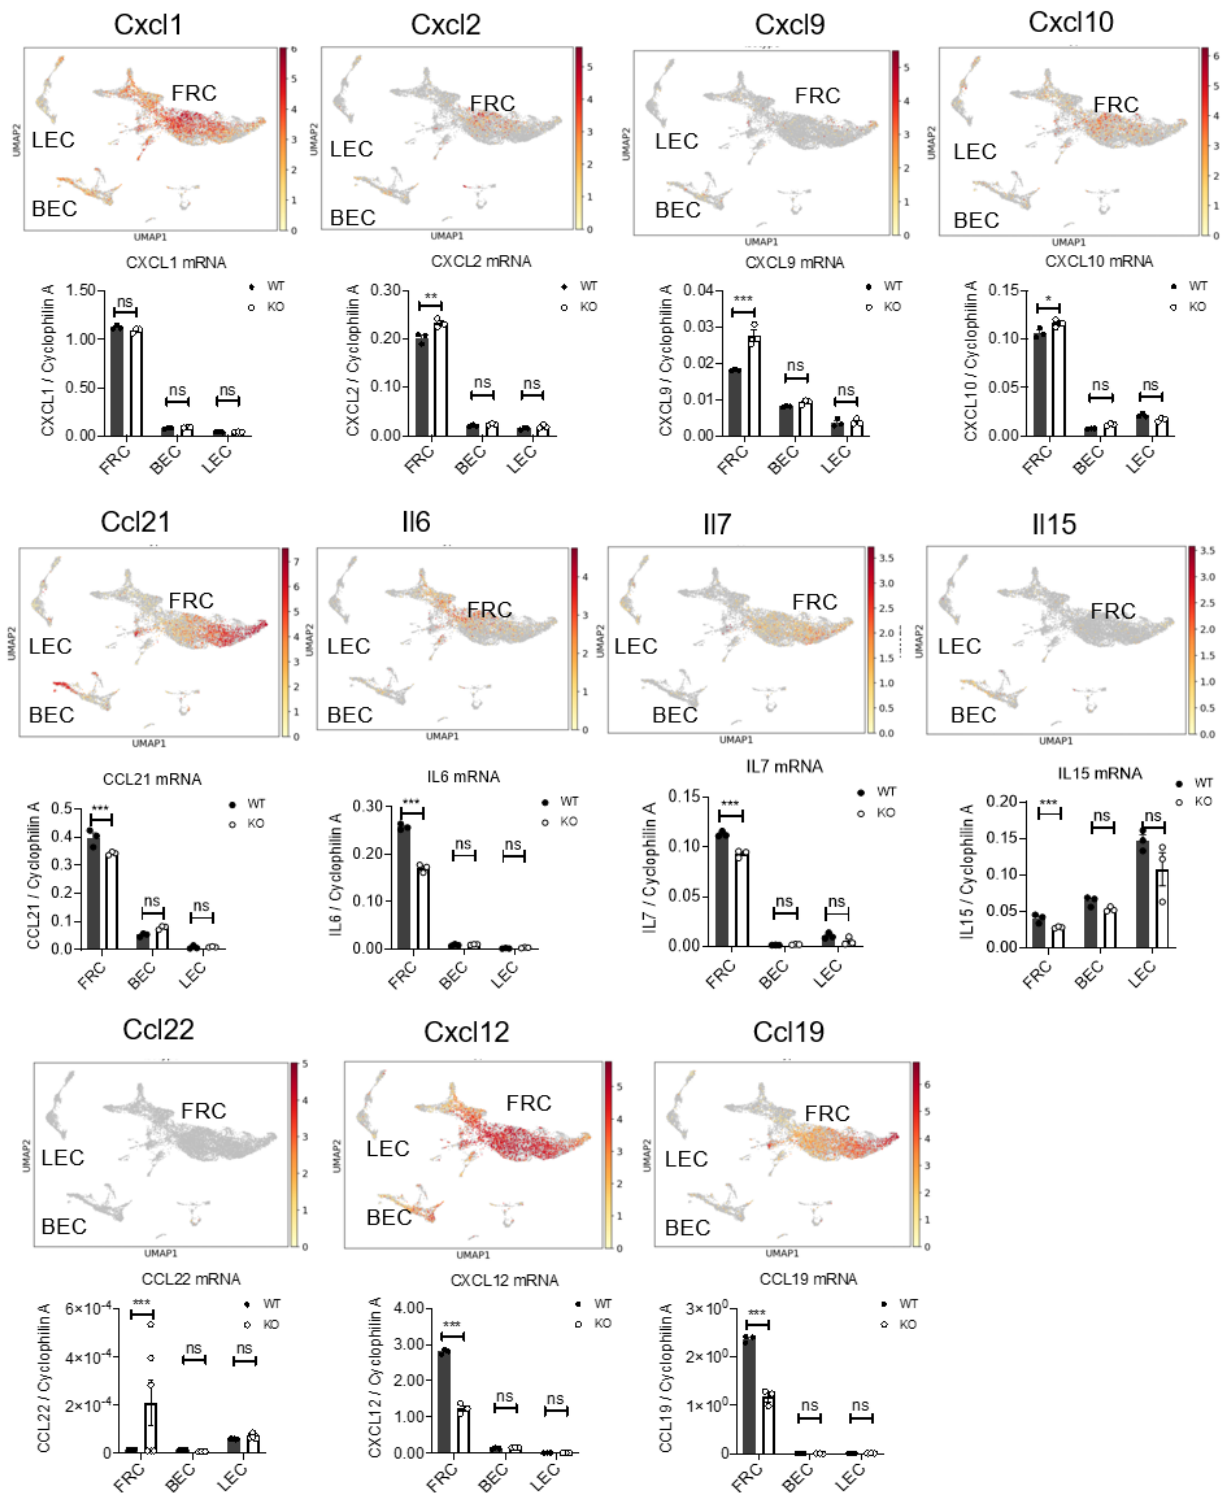

**Figure S7. Depletion of FRC Lama4 alters chemokine and cytokine expressions.** scRNA-seq (feature plots) of WT and qRT-PCR analysis (grouped bar figures) of WT and Lama4 KO mRNA for cytokines and chemokines in LNSC subsets.

**A** *Prox1*/*Lyve-1*/ER-TR7

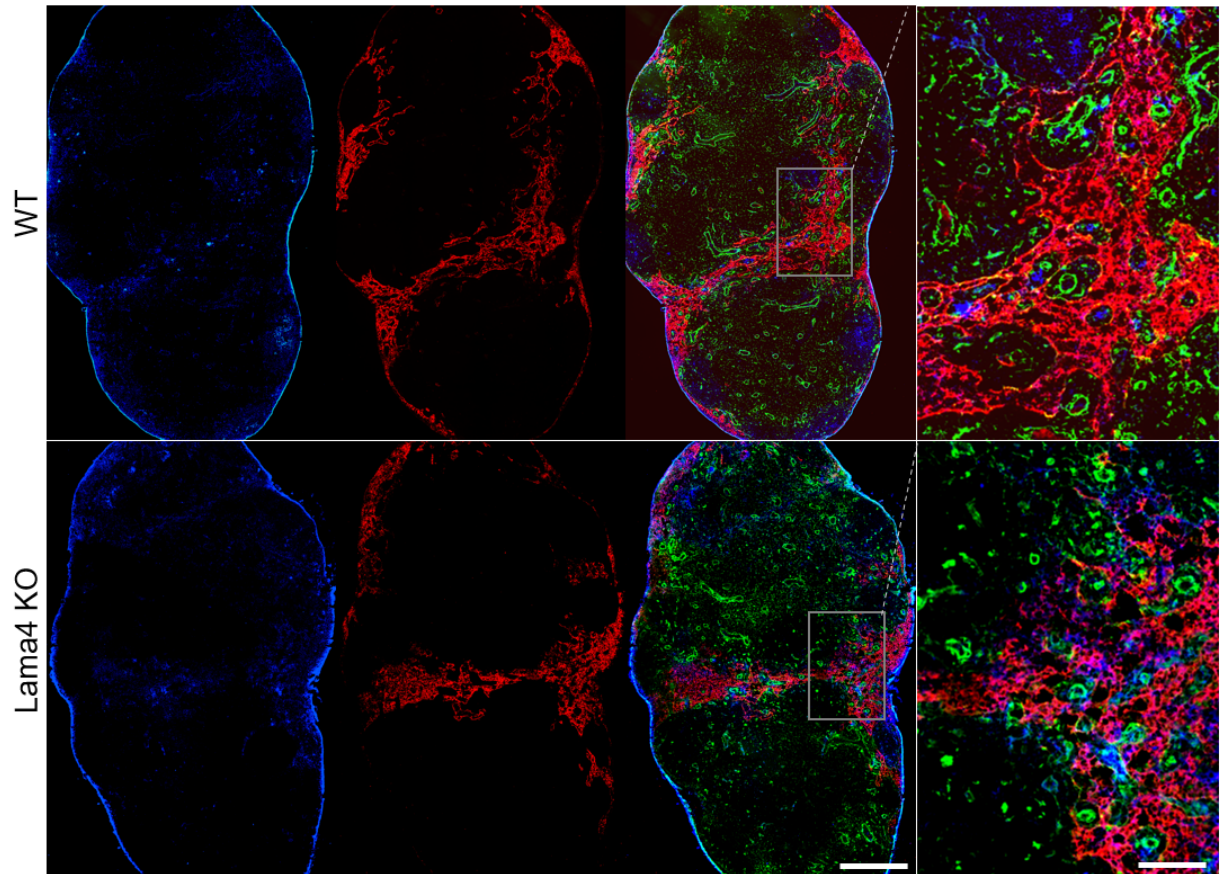

**B**

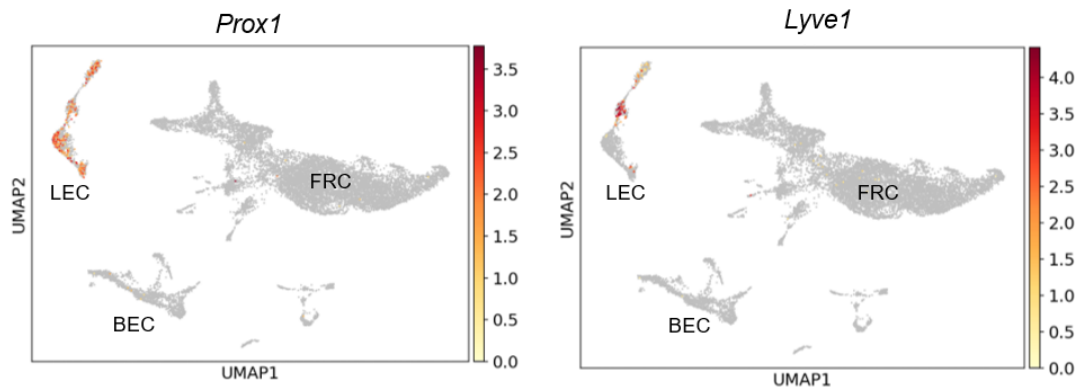

**Figure S8. Depleting Lama4 from LN FRCs does not alter lymphatic vasculature. A.** Representative whole mount scanning images of Lama4 KO and WT LN cryosections stained for Prox1, Lyve-1, and ER-TR7. 20x, scale bars, 500  $\mu$ m (left), 125  $\mu$ m (right). **B.** scRNA-seq (feature plots) analysis of *Prox1* and *Lyve-1* genes in LNSCs from WT C57BL/6 mice.



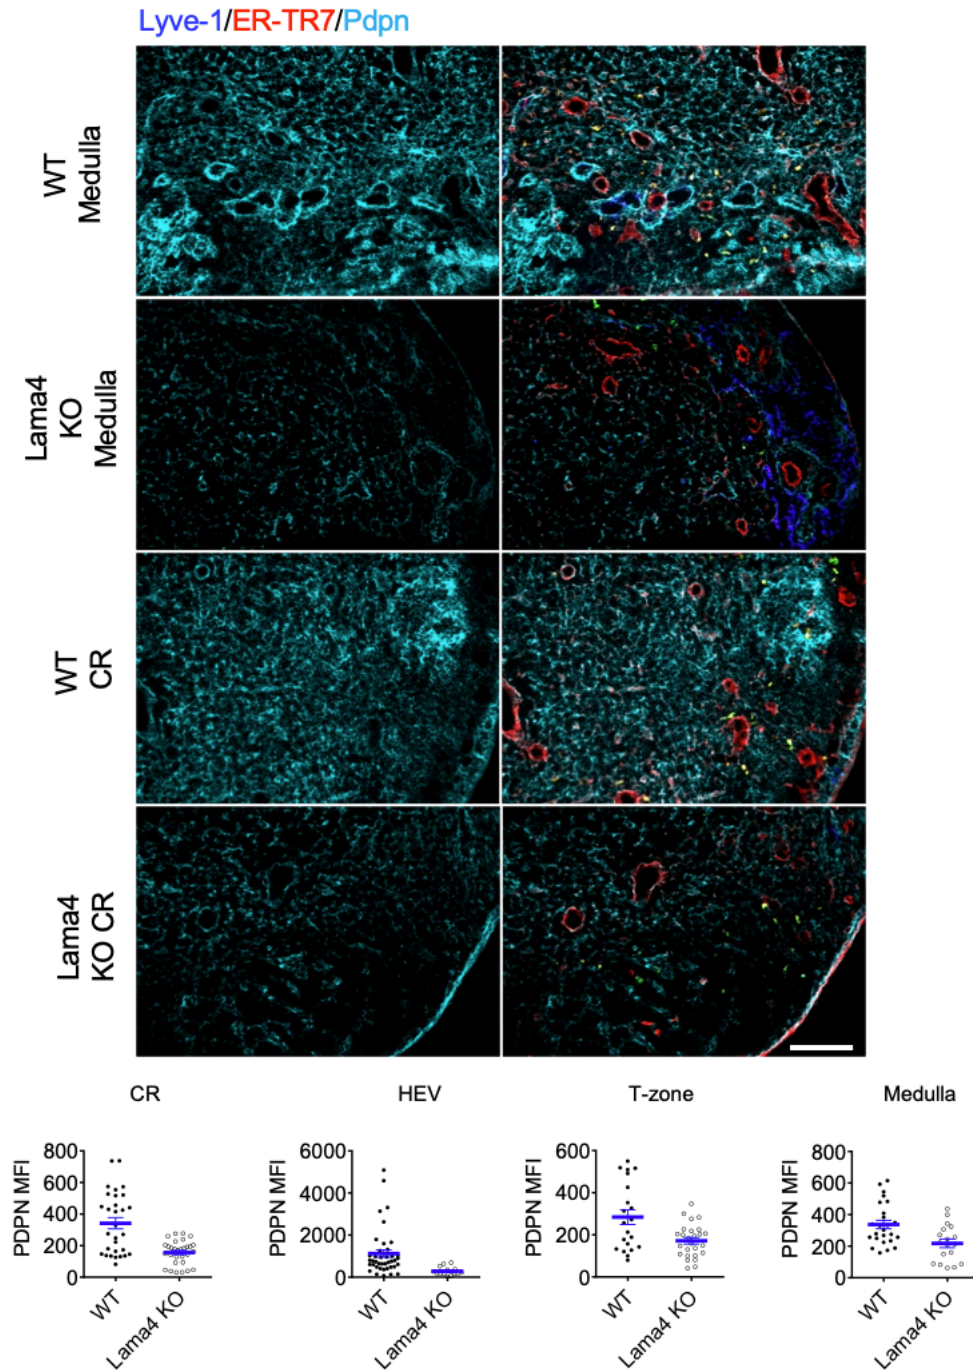

**Figure S9. Depleting FRC Lama4 alters reticular structures.** Representative fluorescent images of Lama4 KO and WT LN cryosections stained for Lyve-1, ER-TR7, and Pdpn. Pdpn quantification in various LN regions. 20x, scale bar, 100  $\mu$ m. CR: Cortical ridge, HEV: High endothelial venules, T-zone: T cell zone.

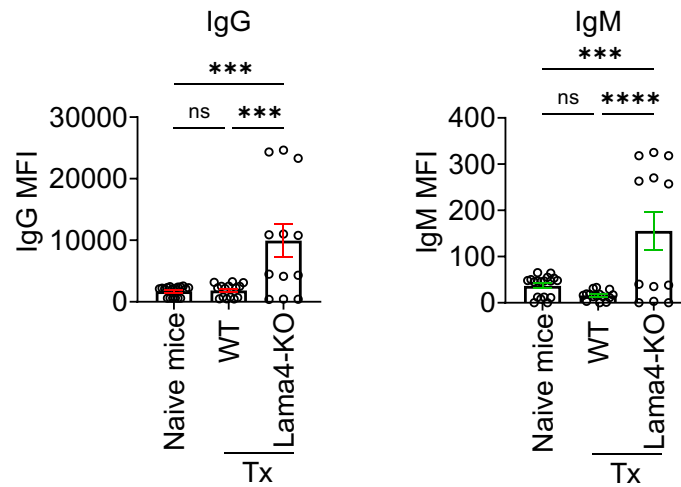

**Figure S10. FRC-Lama4-KO recipients produce more alloantibody after cardiac transplantation.** WT and FRC-Lama4-KO recipients received BALB/c heart transplants and three doses of anti-CD40L (250ug/dose, i.v., days 0, 4, and 7). Naïve C57BL/6 mice without transplantation served as negative controls. Three weeks after transplantation, allo-antibodies in blood serum measured. n=6, One-way ANOVA with Tukey's multiple comparisons test for multiple groups comparison. Mean  $\pm$  SEM, \*\*\*p < 0.001, \*\*\*\*p < 0.0001.

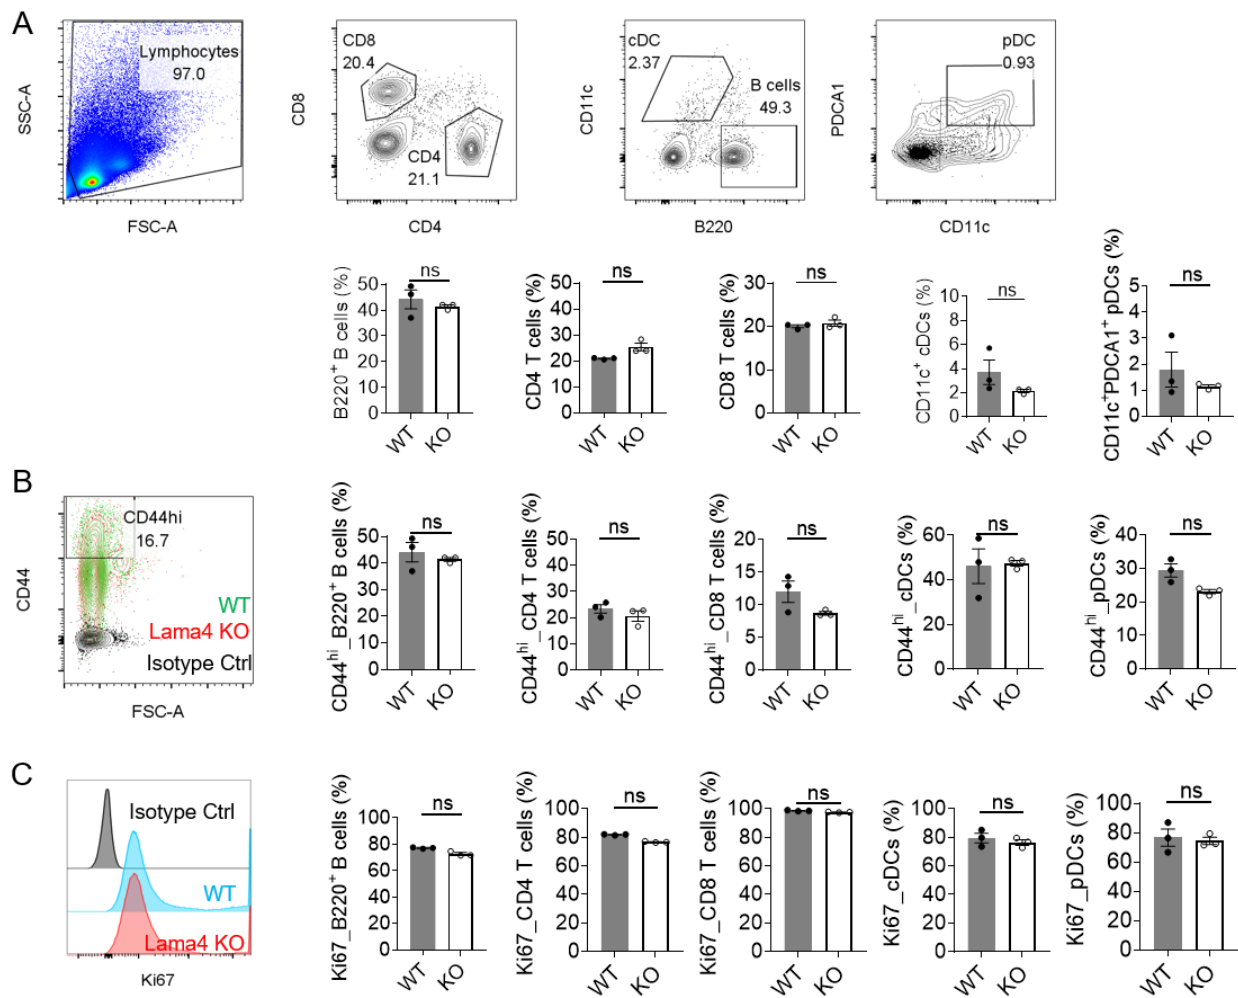

**Figure S11. LN immune cell populations, proliferation, and activation in recipients of lung transplants. A.** 4 days after lung transplantation LNs harvested for analysis of B220<sup>+</sup> B cells, CD4 T cells, CD8 T cells, CD11c<sup>+</sup> cDCs and CD11c<sup>+</sup>PDCA1<sup>+</sup> pDCs. **B-C.** CD44 and Ki67 assessed for cell activation and proliferation, respectively.

**Supplemental Table 1: Antibodies used for flow and immunohistochemistry**

| <b>Antibodies</b>           | <b>Host</b>      | <b>Clone</b>     | <b>Application</b> | <b>Vendor</b>           |
|-----------------------------|------------------|------------------|--------------------|-------------------------|
| Anti-CD3 $\epsilon$         | Rabbit           | 145-2C11         | activation         | ThermoFisher Scientific |
| Anti-CD28                   | Syrian hamster   | 37.51            | IF                 | ThermoFisher Scientific |
| Anti-CD3                    | Rabbit           | Polyclonal       | IF                 | Abcam                   |
| Anti-CD3 $\epsilon$         | Armenian hamster | 145-2c11         | activation         | ThermoFisher Scientific |
| Anti-CD4                    | Rat              | GK1.5            | FACS               | Biolegend               |
| Anti-CD16/32                | Rat              | 93               | FACS               | ThermoFisher Scientific |
| Anti-PDCA-1                 | Rat              | 927              | FACS               | Biolegend               |
| Anti-PDCA-1                 | Rabbit           | Polyclonal       | IF                 | FabGennix               |
| Anti-T-bet                  | Mouse            | 4B10             | FACS               | ThermoFisher Scientific |
| Anti-GATA3                  | Rat              | TWAJ             | FACS               | ThermoFisher Scientific |
| Anti-ROR $\gamma$ T         | Rat              | B2D              | FACS               | ThermoFisher Scientific |
| Anti-Lama4                  | Rat              | 775830           | IF                 | R&D                     |
| Anti-Lama5                  | Rabbit           | Polyclonal       | IF                 | Novus Biological        |
| Anti-PNAd                   | Rat              | MECA-79          | IF                 | BD Biosciences          |
| Anti-ER-TR7                 | Rat              | sc-73355         | IF                 | Santa Cruz              |
| Anti-Rabbit IgG             | Goat             | Polyclonal       | IF                 | Jackson Immunoresearch  |
| Anti-Rat IgG                | Goat             | Polyclonal       | IF                 | Jackson Immunoresearch  |
| Anti-Rabbit IgG             | Donkey           | Polyclonal       | IF                 | Jackson Immunoresearch  |
| Alexa Fluor 405 Anti-Rabbit | Donkey           | Polyclonal       | IF                 | Jackson Immunoresearch  |
| Alexa Fluor 488 Anti-rat    | Donkey           | Polyclonal       | IF                 | Jackson Immunoresearch  |
| Alexa Fluor 568 Anti-Goat   | Donkey           | Polyclonal       | IF                 | Jackson Immunoresearch  |
| Alexa Fluor 647 Anti-rabbit | Donkey           | Polyclonal       | IF                 | Jackson Immunoresearch  |
| Anti-CXCL12                 | Rabbit           | Polyclonal       | IF                 | Invitrogen              |
| Anti-CCL21                  | Rat              | AF457            | IF                 | R&D                     |
| Anti-CD31                   | Rabbit           | Polyclonal       | IF                 | Abcam                   |
| Anti-B220                   | Rat              | RA3-6B2          | FACS               | ThermoFisher Scientific |
| Anti-CD45                   | Rat              | S18009F          | FACS               | Biolegend               |
| Anti-FoxP3                  | Rat              | NRRF-30          | IF                 | Invitrogen              |
| Anti-CD11c                  | HL3              | Armenian Hamster | IF                 | BD Biosciences          |

|             |                  |            |            |                         |
|-------------|------------------|------------|------------|-------------------------|
| Anti-Lyve1  | Rat              | ALY7       | IF         | R&D systems             |
| Anti-IL4    | Rat              | 11B11      | Inhibition | ThermoFisher Scientific |
| Anti-CD69   | Armenian hamster | H1.2F3     | FACS       | ThermoFisher Scientific |
| Anti-VCAM-1 | Mouse            | 1.4C3      | IF         | ThermoFisher Scientific |
| Anti-CD44   | Rat              | IM7        | FACS       | ThermoFisher Scientific |
| Anti-Foxp3  | Rat              | PCH101     | FACS       | ThermoFisher Scientific |
| Anti-CD40L  | Armenian Hamster | MR-1       | Inhibition | Bio X Cell              |
| Anti-IL-33  | Goat             | Polyclonal | IF         | R&D                     |
| Anti-CD62L  | Rat              | MEL-14     | Inhibition | BioXcell                |
| Anti-Pdpn   | Syrian hamster   | eBio8.1.1  | FACS       | ThermoFisher Scientific |
| Anti-IgM    | Rat              | II/41      | FACS       | ThermoFisher Scientific |
| Anti-IgG    | Goat             | Poly4053   | FACS       | Biologend               |

**Supplemental Table 2: Primer sequences for RT-PCR**

| <b>Target</b>        | <b>Forward</b>                    | <b>Reverse</b>                 |
|----------------------|-----------------------------------|--------------------------------|
| <b>Lama5</b>         | 5'-GGACCTCTACTGCAAGCTGGT-3'       | 5'-ATAGGCCACATGGAACACCTG-3'    |
| <b>Lama4</b>         | 5'-AAGCCTCAAGAAAGGGTATGC-3'       | 5'-AAATGTTGCCCTATGGCTTG-3'     |
| <b>CXCL1</b>         | 5'-GGGCGCCTATCGCCAAT-3'           | 5'-ACCTTCAAGCTCTGGATGTTCTTG-3' |
| <b>CXCL2</b>         | 5'-GAAGTCATAGCCACTCTCAAGG-3'      | 5'-CTTCGGTTGAGGGACAGC-3'       |
| <b>CXCL9</b>         | 5'-AATGCACGATGCTCCTGCA-3'         | 5'-AGGTCTTTGAGGGATTTGTAGTG-3'  |
| <b>CXCL10</b>        | 5'-GCCGTCATTTTCTGCCTCA-3'         | 5'-CGTCCTTGCGAGAGGGATC-3'      |
| <b>CXCL11</b>        | 5'-ATGGCAGAGATCGAGAAAGC-3'        | 5'-TGCATTATGAGGCGAGCTTG-3'     |
| <b>CCL19</b>         | 5'-ATGCGGAAGACTGCTGCC-3'          | 5'-CGGAAGGCTTTCACGATGTT-3'     |
| <b>CCL21</b>         | 5'-TCCCGGCAATCCTGTTCTT-3'         | 5'-CCTTCCTCAGGGTTTGCACA-3'     |
| <b>CCL22</b>         | 5'-TCCCTATGGTGCCAATGTG-3'         | 5'-ATATCTCGTTCTTGACGGTTATC-3'  |
| <b>IL-6</b>          | 5'-GAGGATACTACTCCCAACAGACC-3'     | 5'-AAGTGATCATCGTTGTTTCATACA-3' |
| <b>IL-7</b>          | 5'-GATAGTAATTGCCCGAATAATGAACCA-3' | 5'-GTTTGTGTGCCTTGATACTGTTAG-3' |
| <b>IL-15</b>         | 5'-CCATCTCGTGCTACTTGTG-3'         | 5'-CTGTTTGCAAGGTAGAGCACG-3'    |
| <b>CXCL12</b>        | 5'-CTCTGCATCAGTGACGGTAA-3'        | 5'-CTTCAGCCGTGCAACAATCT-3'     |
| <b>VCAM-1</b>        | 5'-GCAGGATGCCGGCATATACG-3'        | 5'-TGCGCAGTAGAGTGCAAGGA-3'     |
| <b>ICAM-1</b>        | 5'-ACCCCAAGGACCCCAAGGAGAT-3'      | 5'-CGACGCCGCTCAGAAGAACCA-3'    |
| <b>MAdCAM-1</b>      | 5'-AGAAGAGGAGATACAAGAGG-3'        | 5'-TAGTGTCTGGGCGAGGACC-3'      |
| <b>VEGF-A</b>        | 5'- T TACTGCTGTACCTCCACC-3'       | 5'- ACAGGACGGCTTGAAGATG-3'     |
| <b>VEGF-C</b>        | 5'-ACCGTGTGCGAATCGACTG-3'         | 5'-AATACGATGGGACACAGCGG-3'     |
| <b>VEGF-D</b>        | 5'- TTGACCTAGTGTCATGGTAAAGC-3'    | 5'- TCAGTGA ACTGGGGAATCAC-3'   |
| <b>Cyclophilin A</b> | 5'-AGGGTGGTGACTTTACACGC-3'        | 5'-ATCCAGCCATTCAGTCTTGG-3'     |
